# Supplementary material for: Lithium cell-assisted low-overpotential Li–O2batteries by in situ discharge activation
Source: Royal Society of Chemistry journal article supplement (doi:10.1039/c7cc05871c), 2017-01-01
Supplement: c7cc05871c1.pdf [file c7cc05871c1.pdf]

**Supporting Information for**

**Lithium Cell Assisted Low-Overpotential Li-O<sub>2</sub> Batteries  
by In Situ Discharging Activation**

Jiehua Liu,<sup>\*a</sup> Wei Chen,<sup>a</sup> Aiming Xing,<sup>a</sup> Xiangfeng Wei,<sup>a</sup> and Dongfeng Xue<sup>b</sup>

<sup>a</sup> Future Energy Laboratory, School of Materials Science and Engineering, Hefei  
University of Technology, 193 Tunxi Road, Hefei, Anhui, 230009, China

<sup>b</sup> State Key Laboratory of Rare Earth Resource Utilization, Changchun Institute of  
Applied Chemistry, Chinese Academy of Sciences, Changchun 130022, China

## Experimental Section

### Electrode preparation.

Li-O<sub>2</sub> battery performances were tested using prototype cell including CR2032 type coin cells with holes on cover (**Figure S1**). Carbon paper (CP) was pre-treated in acetone and ethanol in 10 mins respectively, dried in a vacuum oven overnight at 120 °C. Then the CP electrode was cut with a diameter of 15 mm. Carbon nanotubes and graphene electrode Carbon materials cathode was made by mixing CNTs or graphene and PVDF in weight ratio of 8:2, the mixture was pressed into the stainless steel net (d=15 mm), and then dried in a vacuum oven overnight at 120 °C. We constructed the lithium batteries that contained an electrolyte composed of 1 M lithium bis(trifluoromethanesulfonyl)imide (LITFSI) in tetraethylene glycol dimethyl ether (TEGDME) and a CP cathodes. Pure lithium slice was used as the counter electrode. For electrode activation, the battery was assembled in an argon-filled glove box. The assembled battery was initially discharged at different currents of 0.27, 0.54, 0.81 and .108 mA with cut-off voltage of 0.01, 0.1, 0.5, and 1 V on a Neware CT-3008 battery testing system, Electrochemical studies of Li-O<sub>2</sub> batteries were also performed at room temperature (25 °C). After filled with oxygen in the prototype cells, discharge-charge curves were tested at a current of 0.03 mA between 2.2 and 4.5 V with a cut-off capacity of 1 mAh. More information is provided in Supporting Information.

### Characterizations:

The crystal structure was characterized by X-ray diffraction (XRD, D/MAX 2500V) on an instrument equipped with Cu K $\alpha$  radiation that was operated over a 2 $\theta$  range of 20°-35° in a continuous scan mode with a scan rate of 2°min<sup>-1</sup>. The morphology of the carbon paper was examined using field emission scanning electron microscopy (FESEM, SU8020). Raman spectroscopy was performed using a Raman spectrometer (Horiba Jobin Yvon, HR Evolution). X-ray photoelectron spectroscopy (XPS) experiments were carried out on a Thermo ESCALAB 250XI instrument using aluminum K $\alpha$  X-ray radiation. XPS spectral analysis was conducted using XPS Peak-

fit software.

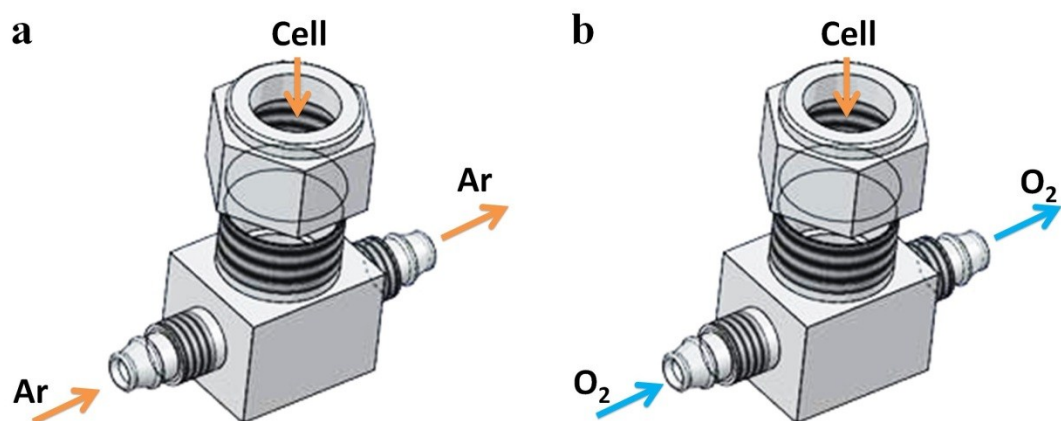

**Figure S1.** Prototypes of bifunctional tester for lithium ion cell (a) and lithium oxygen cell (b).

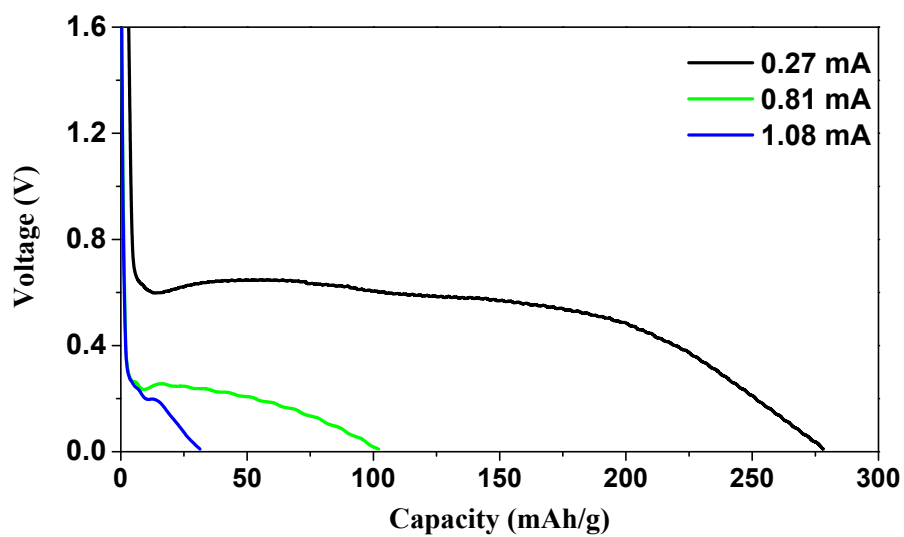

**Figure S2.** Discharging curves of Li/GCP cells with different current of 0.27, 0.81 and 1.08 mA respectively.

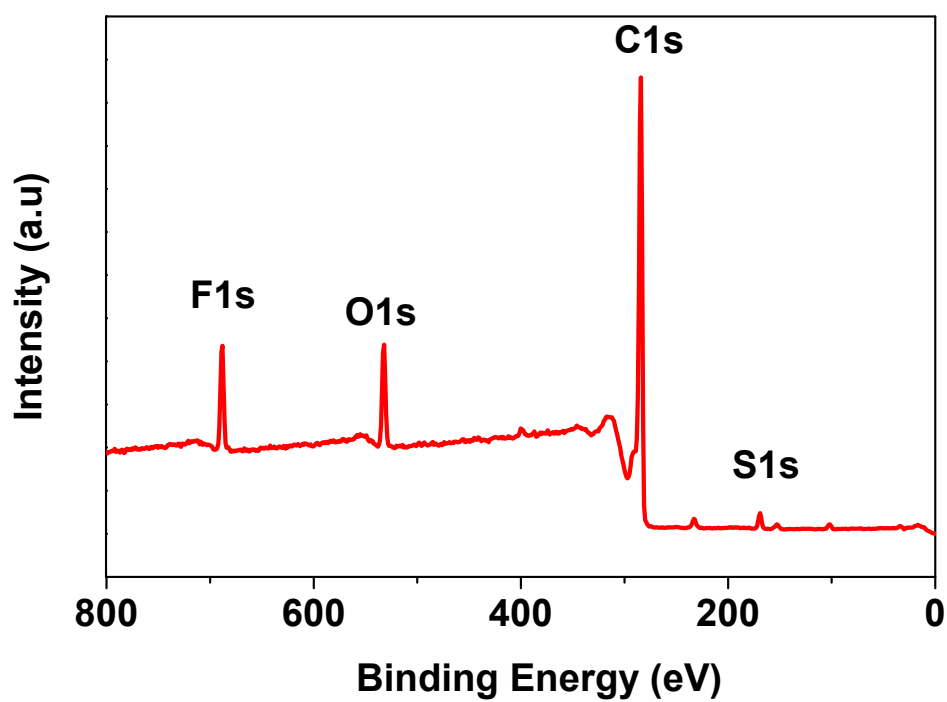

**Figure S3.** The survey XPS curve of activated CP with discharging to 0.01V.

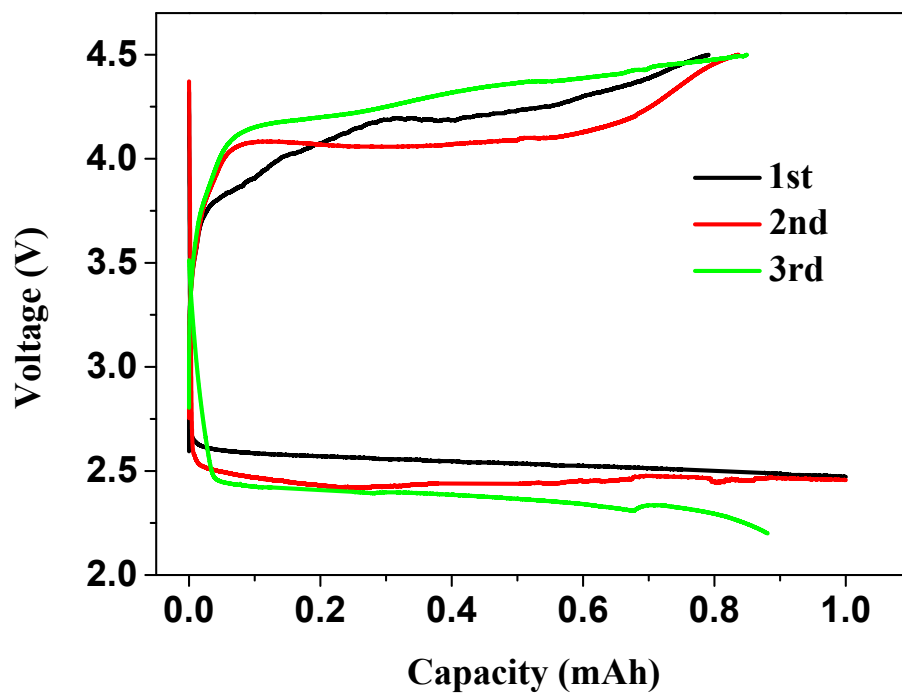

**Figure S4.** Discharge/charge curves of LOB with CPs activated at a rate of 0.54 mA

with cut-off voltage of 1V (GCP-1V-0.54mA).

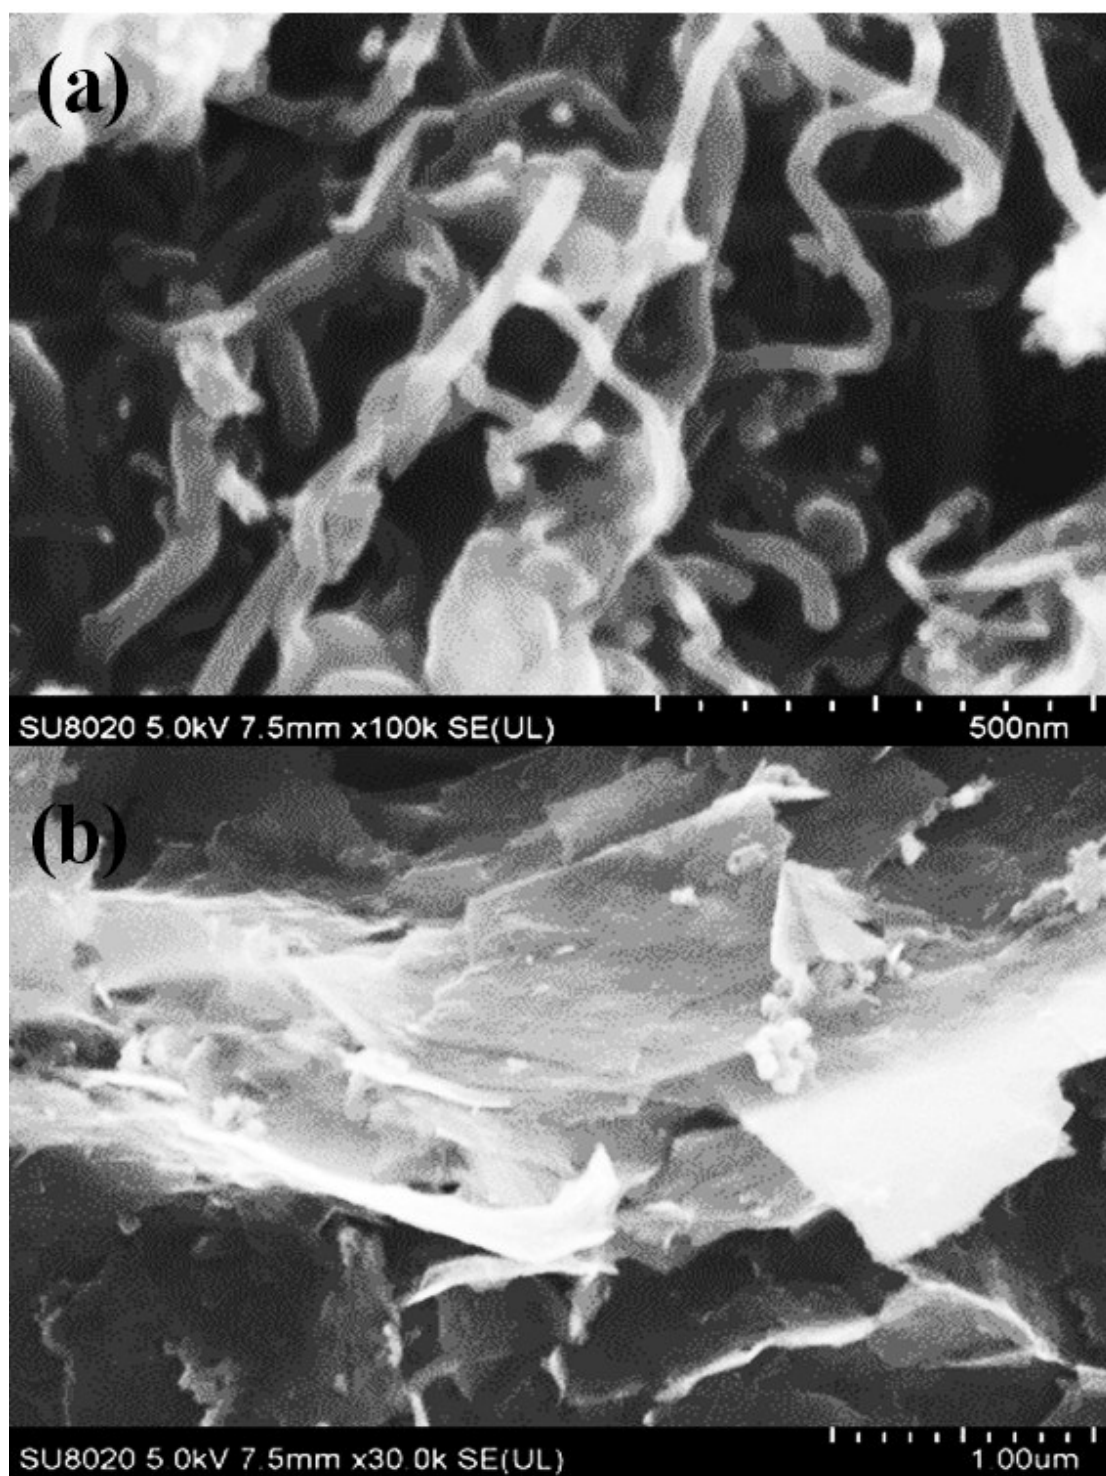

**Figure S5.** FESEM images of CNTs (a) and graphene (b).

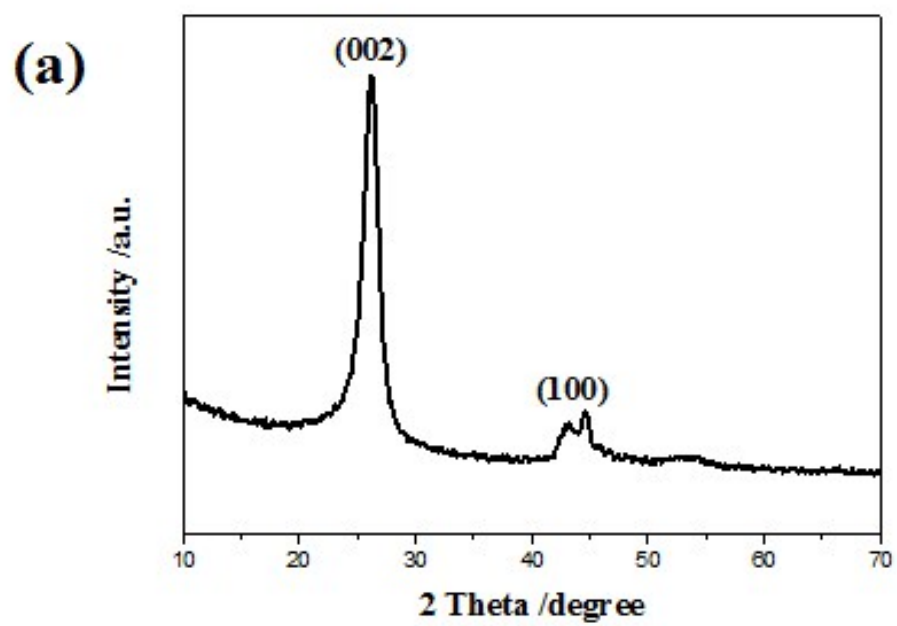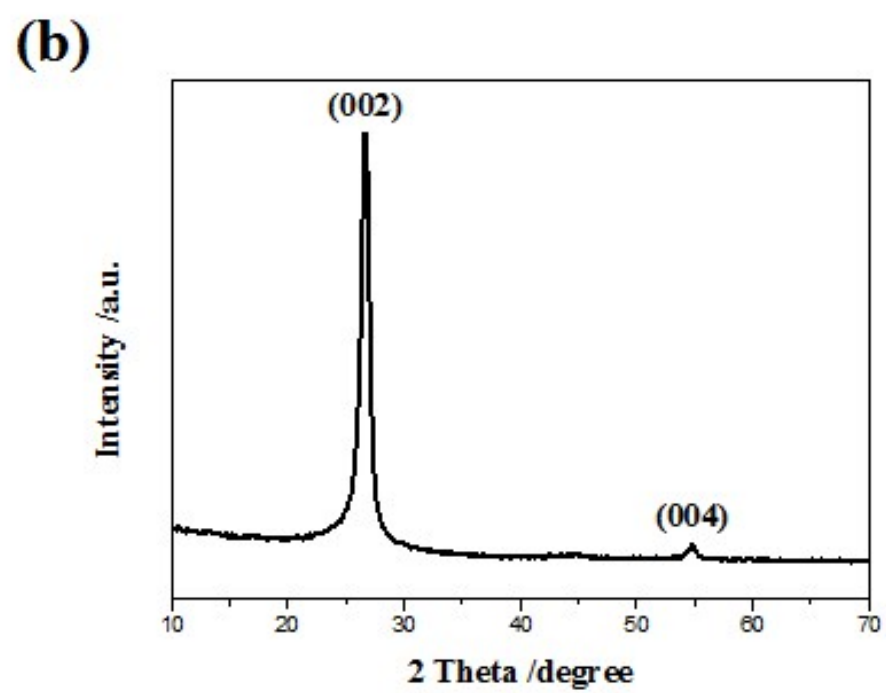

**Figure S6.** XRD patterns of CNTs (a) and graphene (b).

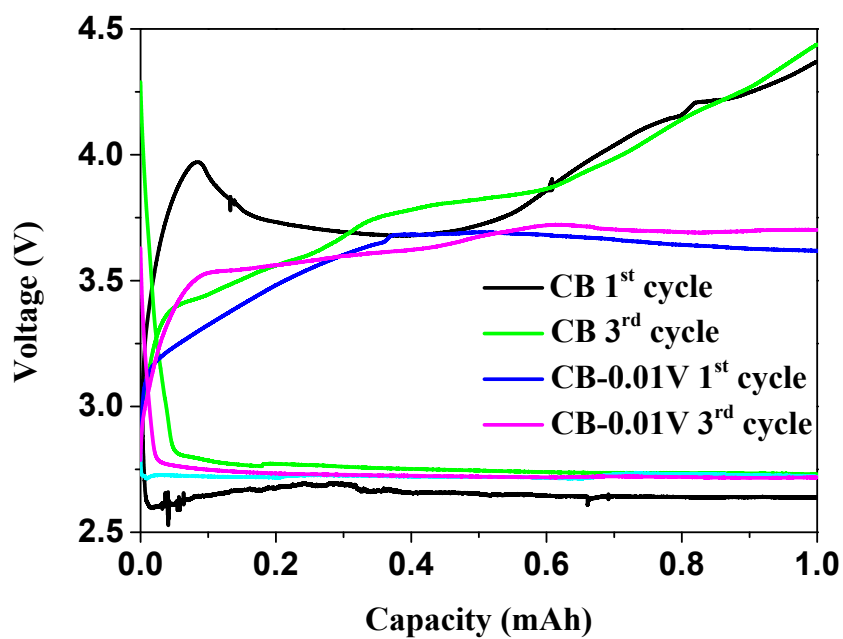

**Figure S7.** The discharge-charge profiles of carbon black at a current of 0.54 mA.

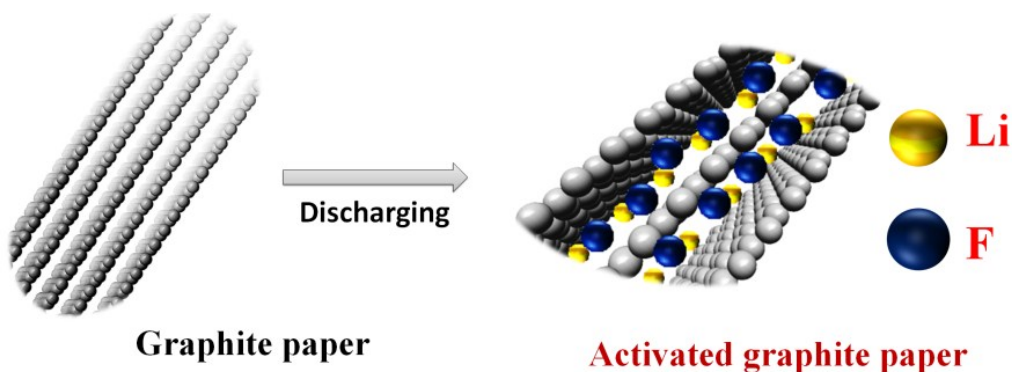

**Figure S8.** Scheme of the proposed activated method for graphite based materials.
